# Supplementary material for: Correlation between religion, spirituality and perception of healthcare services utilisation in Poland during COVID-19 pandemic
Source: PeerJ. 2022 Nov 29;10:e14376. doi: 10.7717/peerj.14376 (PMC9744140; doi:10.7717/peerj.14376)
Supplement: Supplemental Information 1 — These data were used to provide an analysis of the correlation between religion, spirituality and the use of healthcare services in Poland during the COVID-19 pandemic. [file peerj-10-14376-s001.xlsx]

## Sheet: Arkusz1
Sex	What is your religious affiliation:	What significance does religion have in your life:	Did your spiritual life help you during the COVID-19 pandemic?	How would you rate the accessibility of healthcare services before the COVID-19 pandemic?	How would you rate the accessibility of healthcare services during the COVID-19 pandemic?	How would you rate the quality of healthcare services before the COVID-19 pandemic?	How would you rate the quality of healthcare services during the COVID-19 pandemic?
Women	Catholicism	plays a major role	Yes	7	3	7	7
Women	Catholicism	difficult to say	Yes	8	5	8	6
Women	Catholicism	difficult to say	Yes	10	7	10	8
Women	Buddhism	plays a major role	No	3	1	3	1
Women	-	difficult to say	No	5	3	5	2
Men	Catholicism	difficult to say	No	2	1	2	1
Women	Catholicism	plays a minor role	No	7	4	6	8
Women	-	does not play a role	No	8	0	7	0
Women	Agnosticism	difficult to say	No	6	4	7	3
Women	-	plays a major role	Yes	9	3	7	3
Women	Catholicism	plays a major role	Yes	8	6	10	10
Men	-	difficult to say	No	6	3	6	1
Women	Catholicism	difficult to say	No	3	1	2	1
Men	Atheism	plays a minor role	Yes	5	1	7	3
Men	-	does not play a role	No	0	0	0	0
Women	I profess no faith	does not play a role	No	6	4	6	3
Men	Catholicism	plays a major role	Yes	7	4	7	7
Women	Catholicism	difficult to say	Yes	4	4	6	6
Women	Catholicism	plays a major role	Yes	8	3	6	2
Men	Catholicism	does not play a role	Yes	6	2	6	1
Men	-	plays a minor role	Yes	8	3	6	3
Women	Catholicism	difficult to say	Yes	3	2	3	2
Women	Catholicism	plays a major role	No	7	2	5	5
Women	-	does not play a role	No	3	3	3	3
Men	Atheism	does not play a role	No	5	5	5	5
Women	Catholicism	difficult to say	No	7	3	5	3
Women	-	plays a minor role	No	6	5	4	5
Women	Catholicism	difficult to say	Yes	4	1	4	1
Women	-	does not play a role	No	8	7	9	9
Women	Christianity	plays a minor role	No	6	0	4	0
Women	Agnosticism	plays a minor role	Yes	7	3	7	4
Men	Catholicism	plays a minor role	No	5	3	7	5
Women	Believer	plays a minor role	No	8	6	8	5
Women	-	difficult to say	No	8	6	9	7
Women	-	does not play a role	No	4	1	5	2
Men	-	plays a minor role	No	7	3	5	3
Women	-	does not play a role	No	3	1	4	2
Women	-	difficult to say	No	7	7	8	8
Men	Catholicism	plays a minor role	Yes	6	4	6	4
Women	Catholicism	has a key role	Yes	5	3	5	3
Women	-	difficult to say	No	3	0	3	0
Men	Catholicism	has a key role	Yes	4	2	5	4
Men	Catholicism	plays a minor role	Yes	7	5	7	6
Women	Catholicism	difficult to say	No	6	1	6	2
Women	-	does not play a role	No	7	3	7	6
Women	I do not want to answer this question	plays a minor role	Yes	7	1	7	0
Women	Catholicism	difficult to say	No	5	3	5	3
Women	Catholicism	difficult to say	No	6	5	7	6
Women	Catholicism	difficult to say	Yes	4	2	5	2
Men	Catholicism	plays a minor role	Yes	6	2	7	2
Women	-	does not play a role	Yes	5	5	5	5
Women	Catholicism	has a key role	Yes	5	4	6	4
Women	Catholicism	plays a major role	Yes	8	4	10	10
Women	Catholicism	difficult to say	Yes	7	2	7	4
Men	Catholicism	difficult to say	No	5	0	5	0
Men	-	does not play a role	Yes	4	3	7	2
Women	-	does not play a role	Yes	7	3	8	7
Women	Atheism	does not play a role	No	6	6	10	10
Women	-	does not play a role	Yes	3	1	5	0
Men	-	does not play a role	No	10	6	5	1
Women	-	does not play a role	Yes	5	0	5	0
Women	-	difficult to say	Yes	5	10	4	9
Women	-	plays a minor role	Yes	3	2	3	2
Women	Catholicism	difficult to say	No	5	2	5	5
Men	Catholicism	difficult to say	No	8	2	8	3
Men	-	plays a minor role	No	3	3	6	3
Men	I don’t have	plays a minor role	No	5	3	3	2
Men	-	does not play a role	Yes	7	2	7	2
Women	-	difficult to say	No	7	2	9	3
Men	Catholicism	does not play a role	Yes	7	4	7	4
Women	Catholicism	plays a major role	Yes	6	6	6	6
Men	-	does not play a role	No	5	3	5	5
Women	-	plays a major role	Yes	9	8	9	8
Men	Agnosticism	does not play a role	No	5	2	3	3
Men	-	does not play a role	No	1	1	2	2
Women	-	difficult to say	No	6	4	6	5
Men	Atheism	does not play a role	Yes	1	0	1	0
Men	-	plays a minor role	Yes	5	1	6	1
Women	-	plays a major role	Yes	7	4	1	0
Women	I do not belong	does not play a role	No	5	1	6	1
Men	-	difficult to say	No	7	3	9	4
Women	-	plays a minor role	Yes	2	1	4	4
Women	Atheism	does not play a role	No	7	6	8	8
Women	Catholicism	plays a major role	Yes	5	1	4	1
Women	-	plays a minor role	Yes	6	4	7	7
Women	Catholicism	plays a major role	Yes	4	4	4	4
Women	-	difficult to say	Yes	6	2	6	5
Men	Christianity	difficult to say	Yes	5	4	5	5
Women	Catholicism	difficult to say	No	7	4	8	3
Women	Catholicism	plays a major role	Yes	6	3	6	3
Women	Catholicism	plays a major role	Yes			5	3
Women	-	difficult to say	No	7	7	7	7
Men	Catholicism	plays a major role	Yes	5	4	7	6
Women	Catholicism	plays a major role	Yes	5	2	5	3
Women	Catholicism	plays a major role	Yes	5	5	5	5
Men	Catholicism	plays a minor role	No	4	0	5	0
Women	-	does not play a role	No	4	1	1	0
Women	-	does not play a role	Yes	6	2	6	2
Men	-	does not play a role	Yes	1	0	0	0
Men	Christianity	difficult to say	No	5	2	6	3
Men	Catholicism	plays a major role	Yes	10	10	10	10
Women	Catholicism	plays a major role	Yes	10	10	10	10
Women	Catholicism	plays a major role	Yes	10	5	10	5
Men	Catholicism	plays a major role	Yes	6	7	8	7
Women	Christianity	difficult to say	No	5	1	5	1
Women	Catholicism	plays a minor role	Yes	10	10	10	10
Women	-	does not play a role	No	4	2	4	2
Women	Catholicism	does not play a role	No	6	4	7	4
Women	Atheism	does not play a role	No	7	3	7	3
Women	Catholicism	plays a major role	Yes	9	3	9	6
Women	Catholicism	has a key role	Yes	3	1	3	1
Men	Catholicism	does not play a role	No	5	3	8	5
Women	Catholicism	plays a major role	No	6	3	6	3
Men	Catholicism	plays a major role	Yes	10	10	10	10
Men	Catholicism	difficult to say	No	3	2	3	1
Men	Catholicism	difficult to say	No	9	8	9	7
Men	Christianity	plays a major role	No	-	-	-	-
-	-	-	Yes	6	2	5	3
Women	Catholicism	plays a major role	Yes	5	3	5	3
Women	Catholicism	plays a minor role	Yes	5	4	8	5
Women	Christianity	plays a major role	Yes	10	6	9	9
Women	-	difficult to say	Yes	7	5	7	6
Women	Christianity	has a key role	Yes	4	2	5	4
Women	Catholicism	difficult to say	Yes	7	1	6	3
Men	-	plays a minor role	No	1	0	0	0
Women	Catholicism	plays a minor role	No	5	3	5	3
Women	-	difficult to say	Yes	8	8	8	8
Women	Atheism	does not play a role	No	6	4	6	6
Women	Christianity	plays a minor role	No	4	2	2	6
Men	-	plays a minor role	Yes	-	-	-	-
Women	Catholicism	plays a major role	Yes	7	4	7	4
Women	Atheism	does not play a role	No	6	2	6	2
Men	Catholicism	difficult to say	Yes	8	8	8	8
Men	Catholicism	plays a minor role	No	6	3	5	7
Women	-	does not play a role	No	10	5	10	5
Men	-	difficult to say	No	7	5	7	5
Women	Catholicism	difficult to say	Yes	3	1	5	1
Women	-	does not play a role	Yes	3	0	3	0
Men	Catholicism	plays a major role	No	8	4	7	5
Women	-	does not play a role	No	6	6	6	6
Women	-	does not play a role	No	7	7	7	7
Women	-	plays a minor role	Yes	4	6	4	5
Women	-	does not play a role	No	10	10	10	10
Men	-	plays a major role	Yes	5	2	5	5
Men	-	difficult to say	No	8	3	8	3
Women	Catholicism	has a key role	Yes	6	4	8	8
Men	-	plays a minor role	No	8	5	5	5
Women	Catholicism	plays a major role	Yes	7	4	8	6
Women	Catholicism	difficult to say	No	2	1	3	1
Women	Catholicism	difficult to say		6	2	6	2
Men	-	does not play a role	Yes	4	1	5	2
Men	-	does not play a role	No	0	0	0	0
Women	Catholicism	plays a major role	Yes	6	2	6	2
Women	-	difficult to say	Yes	10	10	10	10
Women	-	does not play a role	Yes	8	6	9	9
Women	-	difficult to say	Yes	6	5	7	6
Women	-	does not play a role	No	7	2	7	2
Women	Catholicism	difficult to say		5	3	5	3
Women	Catholicism	has a key role	Yes	10	8	10	8
Women	-	does not play a role	No	9	3	9	3
Men	Catholicism	plays a major role	No	7	5	6	4
Men	Catholicism	difficult to say	Yes	8	7	7	6
Men	Catholicism	plays a minor role	No	9	8	9	6
Women	Catholicism	difficult to say	No	8	3	7	3
Men	Catholicism	plays a major role	Yes	7	6	7	7
Men	Catholicism	plays a minor role	No	8	6	8	6
Women	Catholicism	difficult to say	No	10	10	10	10
Women	Catholicism	plays a major role	No	6	6	8	8
Women	-	difficult to say	No	4	3	4	4
Women	-	difficult to say	No	4	3	4	4
Women	-	does not play a role	No	10	10	5	5
Men	Catholicism	has a key role	Yes	7	2	4	1
Men	-	does not play a role	Yes	5	5	5	5
Women	Catholicism	plays a major role	Yes	8	9	7	7
Men	Catholicism	plays a major role	Yes	5	2	7	8
Women	Catholicism	has a key role	Yes	7	4	7	3
Women	Catholicism	plays a major role	Yes	8	3	8	3
Women	Catholicism	difficult to say	Yes	5	3	5	3
Women	-	does not play a role	No	6	3	6	3
Women	Catholicism	plays a major role	Yes	7	4	7	4
Women	Catholicism	-	No	5	3	7	3
Men	-	-	No	7	5	7	7
Women	Catholicism	difficult to say	Yes	10	10	10	10
Women	Catholicism	plays a minor role	No	5	5	7	7
Men	Catholicism	plays a minor role	No	7	4	7	5
Women	-	difficult to say	No	4	2	7	6
Women	Catholicism	difficult to say	Yes	6	3	6	5
Women	Catholicism	plays a major role	No	7	4	7	7
Men	Catholicism	plays a minor role	No	8	8	10	10
Women	Catholicism	plays a major role	No	3	3	3	3
Women	-	-	No	8	2	9	4
Women	-	does not play a role	No	5	5	5	5
Women	-	-	No	3	1	5	4
Women	Catholicism	difficult to say	Yes	7	4	5	5
Women	Catholicism	plays a major role	Yes	8	8	8	9
Men	-	plays a minor role	No	6	6	8	8
Women	Catholicism	has a key role	No	6	3	10	6
Men	Christianity	plays a minor role	Yes	4	2	6	6
Women	Catholicism	plays a major role	Yes	3	8	5	5
Women	Catholicism	has a key role	Yes	6	0	6	1
Women	-	does not play a role	No	6	0	6	0
Men	-	-	Yes	8	8	7	7
Men	Catholicism	plays a minor role	No	7	2	7	2
Women	-	plays a minor role	Yes	5	2	4	1
Men	-	plays a major role	Yes	9	6	5	6
Men	Catholicism	difficult to say	Yes	7	4	8	8
Men	Catholicism	difficult to say	Yes	5	2	5	5
Women	-	does not play a role	No	6	2	8	8
Women	Catholicism	plays a major role	No	7	3	8	3
Women	Catholicism	plays a major role	Yes	9	7	9	7
Women	Catholicism	plays a major role	Yes	7	3	9	3
Men	Christianity	difficult to say	Yes	6	3	5	3
Men	Christianity	difficult to say	No	3	3	3	3
Women	Catholicism	plays a major role	Yes	7	4	7	7
Men	Catholicism	difficult to say	Yes	5	4	5	4
Women	Christianity	has a key role	Yes	5	4	5	5
Women	-	difficult to say	No	5	4	6	4
Women	-	difficult to say	Yes	5	3	7	5
Women	-	plays a minor role	No	1	0	1	1
Women	-	plays a major role	Yes	7	6	5	5
Women	Catholicism	has a key role	Yes	6	2	8	8
Women	-	has a key role	Yes	5	3	5	3
Women	Catholicism	plays a minor role	Yes	5	3	5	3
Women	-	has a key role	Yes	8	6	8	6
Women	Catholicism	difficult to say	No	8	2	6	2
Women	Christianity	has a key role	Yes	10	10	10	10
Men	Catholicism	plays a major role	Yes	6	3	6	4
Women	-	has a key role	Yes
Women	Catholicism	plays a major role	Yes	7	2	8	1
Women	Catholicism	plays a major role	Yes	7	4	8	8
Women	Catholicism	has a key role	Yes	4	0	4	0
Women	-	-	No	8	4	8	5
Women	-	difficult to say	Yes	5	4	5	5
Women	Catholicism	plays a major role	Yes	6	6	7	7
Women	Atheism	does not play a role	No	6	2	5	2
Women	Christianity	plays a major role	Yes	10	3	6	0
Women	Catholicism	plays a major role	Yes	9	5	8	8
Men	-	has a key role	Yes	3	3	4	4
Women	Christianity	difficult to say	Yes	3	0	3	0
Women	-	difficult to say	No	2	2
Men	Catholicism	difficult to say	No	6	6	6	6
Men	Catholicism	plays a major role	No	6	3	7	4
Men	-	-		5	2	5	2
Women	Catholicism	plays a major role	Yes	7	3	8	3
Women	Catholicism	plays a major role	Yes	8	7	8	9
Women	-	-	No	4	2	6	4
Women	Catholicism	has a key role	Yes	7	5	8	4
Women	Christianity	plays a major role	Yes	8	8	8	8
Women	-	-	Yes	10	10	10	10
Women	-	does not play a role	Yes	5	2	5	1
Women	Christianity	difficult to say	No	7	4	7	4
Men	Christianity	plays a major role	No	10	4	9	2
Women	Catholicism	difficult to say	Yes	3	3	5	5
Women	-	does not play a role	No	3	3	7	7
Men	Catholicism	does not play a role	No	6	5	6	5
Men	Atheism	does not play a role	No	5	1	5	1
Men	Atheism	does not play a role	No	9	8	9	8
Women	Catholicism	has a key role	Yes	8	7	8	7
Women	Christianity	difficult to say	No	7	4	7	4
Women	Christianity	plays a major role	Yes	8	5	8	5
Men	Atheism	does not play a role	No	6	6	6	6
Women	Catholicism	plays a minor role	Yes	7	7	8	8
Women	Catholicism	difficult to say	No	6	5	5	4
Women	Catholicism	plays a major role	Yes	6	2	5	1
